# Supplementary figures and images for: Factors associated with initiation and completion of the quadrivalent human papillomavirus vaccine series in an ontario cohort of grade 8 girls
Source: Springer Nature journal article supplement (doi:10.1186/1471-2458-11-645), 2011-08-13

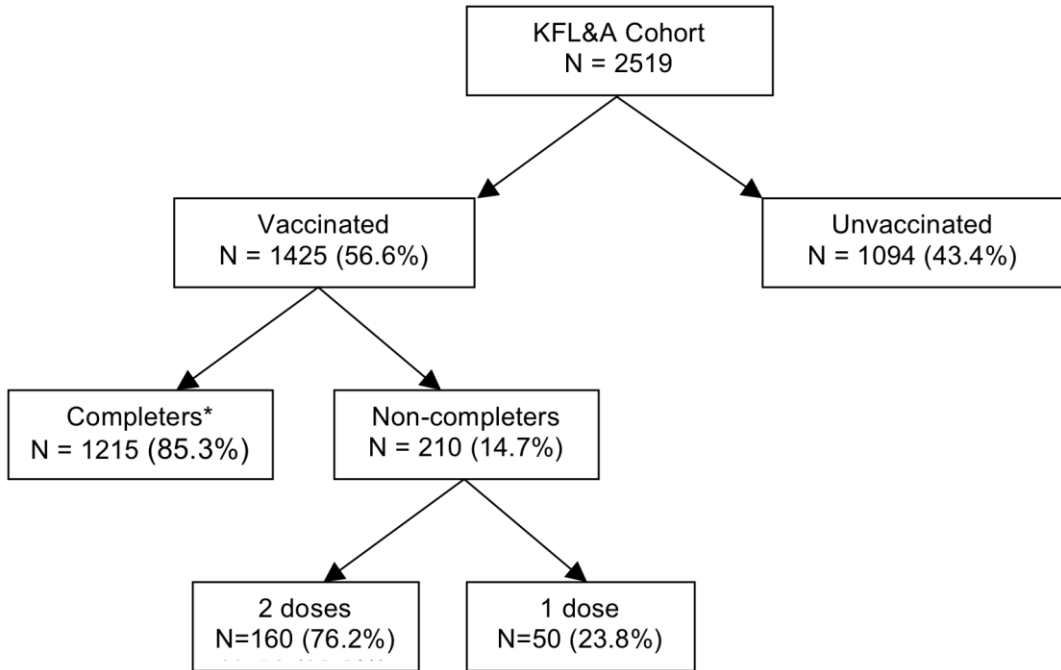

Supplement: 12889_2011_3464_MOESM3_ESM.pdf [file 12889_2011_3464_MOESM3_ESM.pdf]
